## Initiation, elongation and realignment during influenza virus mRNA synthesis

Aartjan J.W. te Velthuis<sup>1,2,#</sup>, Judith Oymans<sup>1,±</sup>

<sup>1</sup>Sir William Dunn School of Pathology, University of Oxford, South Parks Road, Oxford OX1 3RE, United Kingdom. <sup>2</sup>University of Cambridge, Department of Pathology, Division of Virology, Addenbrooke's Hospital, Hills Road, Cambridge CB2 2QQ, United Kingdom.

<sup>#</sup>To whom correspondence should be addressed. Email: [ajwt6@cam.ac.uk](mailto:ajwt6@cam.ac.uk)

<sup>±</sup> Present address: Wageningen Bioveterinary Research, Houtribweg 39, 8221 RA Lelystad, The Netherlands.

Running title: Influenza virus mRNA synthesis

Keywords: Influenza virus, RNA-dependent RNA polymerase, replication, transcription, priming loop, realignment

## Abstract

The RNA-dependent RNA polymerase (RdRp) of the influenza A virus replicates and transcribes the viral genome segments in the nucleus of the host cell. To transcribe these viral genome segments, the RdRp ‘snatches’ capped RNA oligonucleotides from nascent host cell mRNAs and aligns these primers to the ultimate or penultimate nucleotide of the segments for the initiation of viral mRNA synthesis. It has been proposed that this initiation process is not processive and that the RdRp uses a prime-realign mechanism during transcription. Here we provide *in vitro* evidence for the existence of this transcriptional prime-realign mechanism, but show that it only functions efficiently for primers that are not stably base paired with the template. In addition, we demonstrate that transcriptional elongation is dependent on the priming loop of the PB1 subunit of the RdRp. We propose that the prime-realign mechanism may be used to rescue abortive transcription initiation events or cope with sequence variation among primers. Overall, these observations advance our mechanistic understanding of how the influenza A virus initiates transcription correctly and efficiently.

## Importance

The influenza A virus causes severe disease in both humans and birds and is considered a major global health threat. The virus replicates and transcribes its genome using an enzyme called the RNA polymerases. To ensure that the genome is amplified faithfully and abundant viral mRNAs are made for viral protein synthesis the RNA polymerase must transcribe the viral genome efficiently. In this report, we characterise the role of a structure inside the polymerase that helps control the enzyme how viral mRNA molecules are synthesised.

## Introduction

RNA viruses use an RNA-dependent RNA polymerase (RdRp) to replicate and transcribe their viral RNA (vRNA) genome. One of the best studied negative strand RNA viruses is the influenza A virus (IAV). The IAV genome is replicated and transcribed in the nucleus of the host cell by the IAV RdRp, an enzyme that consists of the viral proteins PB2, PB1 and PA (1, 2). The N-terminal third of PB2, the PB1 subunit and the C-terminal two-thirds of PA form the conserved core of the RdRp (3-5), while the remaining portions of PB2 and PA form flexible domains have cap binding and endonuclease activity, respectively (Fig. 1A). The PB1 subunit also contains a conserved  $\beta$ -hairpin called the priming loop, which resides downstream of the activity site of the IAV RdRp and is important for viral replication initiation (4, 6, 7). The promoter for the IAV RdRp consists of the partially complementary 3' and 5' ends of the viral RNA (vRNA) genome segments and is bound by the conserved core of the RdRp (Fig. 1A) (3, 4).

Unlike IAV replication, in which the RdRp initiates *de novo* (6), the IAV RdRp uses a primer-dependent process for viral transcription initiation. To produce this primer, the IAV RdRp must first bind to the C-terminal domain of an actively transcribing, serine 5-phosphorylated RNA polymerase II (Pol II) complex in the nucleus of an infected cell (8, 9). Subsequent binding and cleavage of nascent Pol II transcripts produces 8-14 nucleotides long capped RNAs (10) (Fig. 1A) that the IAV RdRp can hybridise as primers to the 3' terminus of the vRNA template (Fig. 1A). The PA endonuclease domain has a preference for mRNA cleavage 3' of G residues *in vitro* (11, 12), which creates primers that can be hybridised with the penultimate C (2C) of the 3' terminus of the vRNA template (Fig. 1A). This match between cleavage preference and template sequence is also reflected in a recent crystal structure of the influenza B virus RdRp bound to a vRNA and capped primer, which showed that the 3' terminus of the vRNA can 'overshoot' the active site by 1 nt without duplex unwinding and thus position 2C in the active site ostensibly by default (13). This positioning of the vRNA places 2C and 3G in the -1 and +1 indices of the active site, ideal for transcription initiation with primers ending in 3' G from 3G of the template. However, in viral infections and other *in vitro* studies, capped RNA primers with other 3' terminal bases are also frequently produced and used (14-18) and current evidence suggests that these primers are extended from 2C instead (Fig. 1A).

After transcription initiation, the RdRp extends the primer in a template-dependent fashion. However, IAV mRNAs isolated from infected cells often contain 3-nt repeats (GCA or GCG, depending on the segment) that are complementary to the 2<sup>nd</sup>, 3<sup>rd</sup> and 4<sup>th</sup> nucleotide of the template (14, 15). This observation implies that RdRp processivity is limited over the first 4 bases of the template vRNA. It has been proposed that the 3-nt repeats are introduced by the IAV RdRp through a realignment mechanism (14, 15, 18), but direct evidence for this process is currently lacking. Moreover, it is also not known whether there is a link between the generation of capped primers in the host nucleus, the ability of the RdRp to hybridise these primers efficiently to the 3' terminus of the vRNA template, and the generation of these 3-nt duplications.

In this study, we use a combination of structure-guided mutagenesis and *in vitro* polymerase activity assays to provide *in vitro* evidence for the existence of low-processive transcription elongation events that result in a duplication of the first three nucleotides of the vRNA 3' terminus. Moreover, we show that the synthesis of these duplications is dependent on the sequence of the capped primer and the interaction of the body of the RNA primer with the body of the priming loop. These observations thus provide a mechanistic insight into IAV RNA synthesis and redefine the function of the priming loop as a platform for both efficient replication (6, 7) and transcription.

## Results

### The initiation of IAV transcription produces multiple products

IAV transcription uses a capped RNA primer that is snatched from host cell mRNAs and subsequently hybridised to the 3' 1U and/or 2C of the vRNA promoter and extended from the 3' 2C or 3G, respectively (Fig. 1A). Although it is currently assumed that this process is largely dependent on Watson-Crick base pairing between the primer and the template, transcription initiation without Watson-Crick base pairing has been observed (14-18). To study IAV transcription initiation in detail, we expressed the PB1, PB2 and PA subunits of the influenza A/Northern Territories/60/1968 (H3N2) virus in insect cells (9) and purified the recombinant enzyme using a tandem affinity purification (TAP) tag on PB2 as described previously (5). The purified enzyme was analysed by SDS-PAGE for purity (Fig. 1B). Next, we setup reactions containing the IAV RdRp with an 11-nt radiolabelled capped RNA ending in 3' AG (AG primer) and followed the extension of the primer in time (Fig. 1C). PAGE analysis showed that

extension of the primer resulted in one major product and two slower migrating minor products (Fig. 1C). The slowest migrating product was produced ~10 times less efficiently than the major product (Fig. 1C). Transcription products similar to the ones described above have been observed in assays in which IAV RdRp purified from mammalian cells was used to extend a 11-nt long capped primer (6, 7) or a  $\beta$ -globin mRNA-derived primer (19-23), suggesting that these three RNA species are typical IAV transcription products.

To characterise the three products in more detail, we extracted the bands from the acrylamide gel and performed Sanger sequencing. This analysis revealed that the major band corresponded to an RNA species that had initiated at 3' 3G of the template, whereas the second band corresponded to an RNA that had been produced after initiation at 3' 2C of the template (Fig. 1D). Unfortunately, the third band was harder to isolate precisely from the gel due to its faint signal and we therefore extracted a larger fragment. The sequences of this fragment were subsequently found to contain three RNA species (Fig. 1E) that all had at least one duplication of residues 2-4 of the template, similar to the RNA species observed in IAV infections (14, 15, 18). Moreover, the RNA species contained products that had initiated from both 3' 2C and 3' 3G, implying that the duplication of residues 2-4 during transcription elongation occurs independently of the site of transcription initiation. From here on, we will refer to the identified RNA species as the 3G initiated product (GP), the 2C initiated product (CP) and the 3-nucleotide repeat products (RP) for simplicity.

### **Realignment during transcription is dependent on 3' 1U and 4U of the vRNA template**

To verify that the 3G RNA species had indeed been synthesised after initiation at 3' 3G in our assay, we first mutated the 3' 2C of the vRNA promoter to A (2C→A) in order to disrupt G-C base pairing between the AG primer and template. As shown in Fig. 2A, this mutation resulted in a loss of the GP signal and a concomitant increase in the CP signal (Fig. 2A), likely due to an increase in G-U base pairing between the AG primer and template. In the second control, we replaced the AG primer with a primer ending in 3' CA and incubated this with the wild-type promoter, NTPs and the RdRp. As shown in Fig. 2B, this yielded a similar CP product, confirming that GP synthesis is dependent on primer base pairing with 3' 2C and initiation at 3' 3G. A similar result

was obtained when we used a primer ending in 3' AA (Fig. 2C). To fully verify that CP synthesis dependent on base pairing with 1U, we next mutated 3' 1U of the vRNA promoter to A (1U→A) and incubated this promoter with AG primer and the IAV RdRp. We found that in this reaction the CP as well as the RP signals had both been lost (Fig. 2D), which confirms that CP synthesis is dependent on primer base pairing with 3' 1U. Interestingly, when we incubated the CA or the AA primer with the 1U→A template, we found that transcription initiation had been severely impaired, suggesting that A-A base-pairs do not support efficient transcription initiation.

In the above experiments, RP formation was independent of 3' 2C, but dependent on 3' 1U (Fig. 2D). This is in line with the idea that the RP RNA species are formed through a realignment event between positions 4U and 1U (Fig. 2E). To confirm this, we mutated 4U to A (4U→A) in the 3' strand of the vRNA promoter and found that this mutation supported CP and GP formation, but not RP synthesis (Fig. 2D). A similar result was obtained when we mutated 4U to C (4U→C) (Fig. 2F), a sequence variant that down-regulates transcription of segments 1, 2 and 3 of the IAV genome (24). Overall, these findings imply that Watson-Crick base pairing between the primer and the template plays an important role during transcription initiation and that Watson-Crick base pairing between the extended primer and 3' 1U is crucial for RP formation when transcription elongation is not processive.

### **Duplex stability and ssRNA primer length affect transcription processivity**

The above results imply that both transcription initiation relies on base pairing when the IAV RdRp uses primers ending in AG or CA. However, the IAV RdRp can also use primers that are not complementary to the template (15, 16, 18). To investigate how such non-complementary primers affect transcription initiation and elongation processivity, we first replaced the terminal G of the AG primer with U (i.e. creating primer ending in 3' AU; AU primer). On the wild-type vRNA promoter, this AU primer was efficiently extended into a major CP signal and minor GP and RP bands (Fig. 3A). To confirm that the AU primer was indeed primarily extended from 3' 2C, we replaced the wild-type promoter with the 1U→A mutant promoter, because this would enforce U-A base pairing with the 3' A of the mutant promoter and thus produce a CP signal. Indeed, this control reaction yielded a similar CP signal and a weak GP band (Fig. 3A). No RP signal was present in this reaction, because the 3' 1U had been changed to A,

which prevented realignment during non-processive elongation. Thus, we find that U-U base pairs support transcription initiation, while A-A base pairs do not (Fig. 2B and C).

To investigate if we could make the AU primer initiate from G3, we next used the 2C→A mutant promoter in the reaction (Fig. 3A) and found A-U base pairing at positions 1 and 2 of the primer-template duplex supports GP formation. Surprisingly, this altered initiation duplex also upregulated realignment (Fig. 3A) relative to the wild-type template, but also the 3' AG primer promoter-primer reaction (Fig. 1C). This suggests that the duplex that is formed between the 2C→A mutant promoter and the AU primer is less stable and that this reduces the processivity of the IAV RdRp. However, the difference in stability among the various primers and promoters tested is minimal, in particular when we take into account their partial extension products. For instance, the duplex formed during extension of the AU primer on the wild-type promoter is  $\frac{UGCA}{UCGU}$ , whereas the duplex is  $\frac{AUCA}{UAGU}$  when the AU primer is extended on the 2C→A mutant promoter. We therefore reasoned that the stability of the duplex could not solely explain the differences in processivity and we suspected that the ssRNA length of the primer (i.e., the number of bases that is not bound by the template) could play a role as well.

To investigate this further, we performed a transcription reaction with a primer ending in 3' UG (UG primer). Up to the point of realignment, this primer is extended into the same  $\frac{UGCA}{UCGU}$  primer-template duplex as the 3' AU primer on the wild-type template. However, because the UG primer only has 9 ssRNA bases after annealing to the 3' 2C of the promoter (compared to 10 ssRNA bases for the AU primer after annealing with 3' 1U), we would expect an effect on RP formation. Indeed, during extension of the UG primer equal levels of GP and RP were formed (Fig. 3B). Moreover, RP formation was abolished by mutation of 1U (Fig. 3B), without a change in the GP signal, confirming the identity of the RP band. This thus demonstrates that IAV transcription processivity is affected by both the stability of the primer-template duplex and the ssRNA length of the primer.

### **The priming loop suppresses realignment during transcription**

The above observation suggests that a component of the RdRp interacts with the primer to suppress realignment and increase processivity. Superposing the influenza

B virus RdRp with capped RNA primer onto the poliovirus 3D<sup>pol</sup> elongation complex shows that the PB1 priming loop, which is located between the active site and the entrance of the nascent strand exit channel, is ideally positioned to interact with the incoming capped primer (Fig. 4A). The PB1 priming loop was previously found to be crucial for viral replication initiation and prime-realignment (6, 7). Moreover, it was shown that deletion of residues 648-651 of the priming loop ( $\Delta$ 648-651) increased IAV transcription (6), which suggests that the priming loop may play a role in transcription initiation or elongation. To test whether the priming loop affects IAV transcription, we purified a set of seven priming loop truncation mutants (Fig. 4B and C) as described elsewhere (7) and incubated these with AG primer and NTPs. Measurement of the synthesised CP and GP signals showed that mutant  $\Delta$ 648-651 and a mutant lacking PB1 residues 642-656 ( $\Delta$ 642-656) extended the capped primer more efficiently than the wild-type enzyme (Fig. 4C and D). This suggests that in the wild-type enzyme, the tip and  $\beta$ -sheet of the priming loop affect elongation of the capped RNA primer. By contrast, mutant  $\Delta$ 636-642 synthesised CP and GP levels that were indistinguishable from wild-type, while the four other priming loop mutants showed impaired primer extension levels (Fig. 4C and D), likely because they had a general activity impairment (7).

We next analysed the effect of the priming loop on transcription elongation in more detail and measured the RP signal produced by the mutants. This analysis showed that transcriptional realignment appeared increased in reactions containing mutants  $\Delta$ 642-656 and  $\Delta$ 636-642 (Fig. 4C-E). After correction for the differences in the transcriptional activity, we found that the realignment efficiency of mutants  $\Delta$ 642-656 and  $\Delta$ 636-642 was significantly increased compared to wild-type, whereas  $\Delta$ 648-651 was indistinguishable from wild-type. These results imply that the  $\beta$ -strand of the priming loop suppresses realignment during transcription elongation and thus plays a role in the processivity of IAV transcription. Due to the absence of sequence conservation in the  $\beta$ -strand of the loop (Fig. 4B), future crystallographic studies will be required to identify the interaction mechanism between the primer and the priming loop.

## Discussion

The mechanism of influenza virus transcription relies on binding and cleavage of



capped host cell mRNAs and the alignment of the cleavage products to the vRNA template (Fig. 1A). Cleavage is mediated by the PA endonuclease, which preferentially cleaves 3' of G moieties *in vitro* (11, 12). A crystal structure of the influenza B virus RdRp bound to a vRNA template and a capped primer showed that the 3' terminus of the vRNA can enter and even 'overshoot' the active site by 1 nt without duplex unwinding (13). This places 2C and 3G in positions -1 and +1 of the active site (Fig. 5), ideal for transcription initiation with primers ending in 3' G. We here find that primers in 3' G are indeed preferentially base paired with 2C of the template to allow initiation from 3G. However, a substantial fraction of the primers ending in G is also base paired with 1U, enabling initiation from 2C and suggesting that although Watson-Crick base pairing is important for initiation, Watson-Crick base pairing is not essential. Indeed, we also observe that U-U base pairs support efficient initiation, although A-A base pairs do not, which suggests that transcription initiation is subject to different constraints, such as the shape of the primer-template helix.

When no G is available in the first 14 nt of the capped host mRNA, PA-mediated cleavage can occur at other bases *in vitro* (11, 12) and *in vivo* (15, 17). We find that primers ending in a 3' A or U are preferentially aligned to 1U of the template and extended from 2C (Fig. 2 and 3). We did not analyse transcription initiation from primers ending in 3' C in this study. To support transcription initiation from 2C, residues 1U and 2C of the vRNA 3' terminus must be placed at positions -1 and +1 of the active site, respectively (Fig. 5). If initiation from 3G is the default for the RdRp (13), initiation from 2C can occur only if the 3' terminus backtracks 1 nt. This step would leave 5 nt in template entry channel and 1 unpaired base upstream of the entry channel (Fig 5). Although it is presently unknown where this unpaired base can be harboured in the structure, it is tempting to speculate that it can be accommodated below bases 7U and 8C, which are stacked in a T-orientation by residues of the PB2 subunit (the 'T-pocket'). Given that we observe significant initiation from 2C with primers ending in G (Fig. 1C), backtracking of the template is likely a frequent event. An alternative explanation is that initiation from 2C is the default initiation position and that the template must track forward to facilitate initiation from 3G, but this notion is not supported by crystal structures at present.

Our analysis of transcription elongation confirms that the 3-nt duplications that have been found in the 5' termini of IAV mRNAs (15, 18) are the result of a realignment event that transfers a partially extended capped primer from residue 4U of the vRNA

3' end to 1U. In the wild-type RdRp, such realignment events appear to be relatively rare (~10% of elongation events) when the RdRp is extending a primer that can form a double Watson-Crick base pair with the template (i.e., the AG primer). However, 15 other nucleotide combinations exist for the last 2 bases of the primer, which implies that realignment may be more frequent in viral infections. Indeed, in viral infections up to 30% of transcription elongation events involve realignment as shown by deep-sequencing (15). Although we do not understand the importance of the realignment mechanism in IAV RNA synthesis, we do observe an increase in realignment events when i) primer and template are not aligned through Watson-Crick base pairing and ii) the part of the primer that does not base-pair with the template is relatively short (Fig. 3). Without the realignment mechanism, transcription initiation in the above 2 scenarios would produce significantly fewer full-length IAV mRNAs (on a UG primer ~50% of elongation products is realigned; Fig. 3B), which would limit viral protein synthesis in turn. We therefore speculate that the realignment mechanism is a means to rescue low-processive transcription events and prevent abortive transcription initiation. Interestingly, segments with a 3' 4C in the vRNA promoter instead of the canonical 3' 4U show little realignment (Fig. S4C), which may explain why transcription is down regulated on these IAV genome segments (24).

In the wild-type IAV RdRp, the PB1 priming loop suppresses transcription realignment events (Fig. 4). We thus propose that the priming loop interacts with the primer or the primer-template duplex to improve transcription elongation, which, as we argued above, is crucial for IAV mRNA and protein synthesis. This thus provides the IAV RdRp with two mechanisms to optimise viral transcription and help the enzyme elongate efficiently after a cap-snatching event. These observations provide a deeper insight into IAV RNA synthesis and may be relevant for other negative strand RNA viruses as well.

## **Experimental procedures**

### **Cells and plasmids**

Human embryonic kidney (HEK) 293T cells were maintained in DMEM (Sigma) supplemented with 10% fetal calf serum (FCS). Sf9 cells were grown in XPRESS medium (Lonza) supplemented with penicillin and streptomycin. Plasmids pPoll-NA, pcDNA-NP, pcDNA-PB1, pcDNA-PA, pcDNA-PB2-TAP, and pcDNA-PB1a

have been described previously (19, 20, 25). Also the priming loop mutant PB1  $\Delta$ 648-651 (6) and the PA endonuclease mutant D108A (26) and priming loop mutants  $\Delta$ 642-656,  $\Delta$ 636-642,  $\Delta$ 631-662,  $\Delta$ 656-662,  $\Delta$ 631-642 and  $\Delta$ 631-635 have been described elsewhere (7).

### **Sequence alignment and structural modelling**

Amino acid sequences of the PB1 subunits of IAV A/WSN/33 (H1N1), influenza B virus B/Michigan/22687/09, and influenza C virus C/JJ/50 were aligned using ClustalX (27). The alignment was visualised using ESPript (28). To superpose the poliovirus 3D<sup>pol</sup> elongation complex (PDB 3OL7) and the influenza B virus RdRp crystal structure (PDB 5MSG), we aligned active site residues 324-332 of the poliovirus enzyme with residues 442-449 of the bat influenza virus PB1 subunit in Pymol 1.3.

### **Capping and labelling RNA primers**

Synthetic 5' tri- or diphosphate-containing RNAs of 11 nt (Table 1, Chemgenes) were capped with a radiolabelled cap-1 structure using 0.25  $\mu$ M [ $\alpha$ -<sup>32</sup>P]GTP (3,000 Ci mmole<sup>-1</sup>, Perkin-Elmer), 2.5 U/ $\mu$ l 2'-O-methyltransferase (NEB) and a vaccinia virus capping kit (NEB). The products were denatured in formamide and purified as described previously (6).

### ***In vitro* capped oligo nucleotide extension assay**

Capped RNA oligo extensions were typically set up as 25- $\mu$ l reactions containing: 1 mM DTT, 5 mM MgCl<sub>2</sub>, 1U/ $\mu$ l RNAsin (Promega), 1500 cpm capped RNA primer, 0.7  $\mu$ M vRNA promotor (Sigma), 5% glycerol, 0.05% NP-40, 75 mM NaCl, 10 mM HEPES pH 7.5, and  $\sim$ 1  $\mu$ M RdRp. The reactions were pre-incubated for 20 min at 30 °C and then started by adding 500  $\mu$ M UTP, 500  $\mu$ M ATP, 500  $\mu$ M CTP, 500  $\mu$ M GTP. Aliquots of were taken at the time points indicated and stopped with 4  $\mu$ l formamide loading buffer. Samples subsequently denatured and analysed by 20% denaturing PAGE. The extended capped primers were visualised by phosphorimaging. P-values were determined using an unpaired t-test. To sequence the extended capped primers, products were excised from the 20% denaturing PAGE gel, eluted overnight in water and desalted over NAP-10 columns

(GE Healthcare). The isolated RNA was next polyadenylated with polyA polymerase (NEB), reverse transcribed with dTGG primer 5'-CACGACGCTCTTCCGATCTTTTTTTTTTTTTTTTTTTGG-3', and turned into dsDNA using 2<sup>nd</sup> strand primer 2ND\_GA 5'-GTTTCAGACGTGTGCTCTTCCGATCTGA+AT+A+CTCAAG-3' (here "+" indicates an LNA base). To remove excess primer, the DNA was treated with exonuclease VII (NEB) for 1 h and subsequently heated to 70 °C for 10 min to denature the exonuclease. Finally, the DNA was amplified with GoTaq (Promega) using primers P5 5'-AATGATACGGCGACCACCGAGATCTACACTCTTCCCTACACGAC/GCTCTTCCGATCT-3' and i7003 5'-CAAGCAGAAGACGGCATACTGGTGTGACTGGAGTTCAGACGTGT/GCTCTTCCGATCT-3', and TOPO cloned (Invitrogen) for Sanger sequencing.

### **Acknowledgements**

The authors thank Dr Ervin Fodor for support and suggestions and Dr David Bauer for the i7003 and P5 primers. This work was funded by Wellcome Trust grants 098721/Z/12/Z and 206579/Z/17/Z (to AJWtV), grant 825.11.029 from the Netherlands Organization for Scientific Research (to AJWtV) and an Erasmus+ mobility grant (to JO).

### **Conflict of interest**

The authors have no competing interests.

### **Author contributions**

AJWtV designed experiments. JO and AJWtV performed experiments and analysed data. AJWtV wrote manuscript.

### **References**

1. te Velhuis AJ, Fodor E. Influenza virus RNA polymerase: insights into the mechanisms of viral RNA synthesis. 2016. *Nat Rev Microbiol* 18:473-493
2. Fodor E. The RNA polymerase of influenza a virus: mechanisms of viral transcription and replication. 2013. *Acta Virol* 57:113-122

3. Reich S, Guilligay D, Pflug A, Malet H, Berger I, Crépin T, Hart D, Lunardi T, Nanao M, Ruigrok RW, Cusack S. Structural insight into cap-snatching and RNA synthesis by influenza polymerase. 2014. *Nature* 516:361-366
4. Pflug A, Guilligay D, Reich S, Cusack S. Structure of influenza A polymerase bound to the viral RNA promoter. 2014. *Nature* 516:355-360
5. Hengrung N, El Omari K, Serna Martin I, Vreede FT, Cusack S, Rambo RP, Vonrhein C, Bricogne G, Stuart DI, Grimes JM, Fodor E. Crystal structure of the RNA-dependent RNA polymerase from influenza C virus. 2015. *Nature* 527:114-117
6. te Velthuis A, Robb NC, Kapanidis AF, Fodor F. The role of the priming loop in influenza A virus RNA synthesis. 2016. *Nature Microbiology* 1:16029
7. Oymans J, te Velthuis AJ. A mechanism for prime-realignment during influenza A virus replication. 2017. *BioRxiv* doi:10.1101/138487
8. Lukarska M, Fournier G, Pflug A, Resa-Infante P, Reich S, Naffakh N, Cusack S. Structural basis of an essential interaction between influenza polymerase and Pol II CTD. 2016. *Nature* 541:117-121
9. Martínez-Alonso M, Hengrung N, Fodor E. RNA-Free and Ribonucleoprotein-Associated Influenza Virus Polymerases Directly Bind the Serine-5-Phosphorylated Carboxyl-Terminal Domain of Host RNA Polymerase II. 2016. *J Virol* 90:6014-6021
10. Chung TD, Cianci C, Hagen M, Terry B, Matthews JT, Krystal M, Colonno RJ. Biochemical studies on capped RNA primers identify a class of oligonucleotide inhibitors of the influenza virus RNA polymerase. 1994. *Proc Natl Acad Sci U S A* 91:2372-2376
11. Datta K, Wolkerstorfer A, Szolar OH, Cusack S, Klumpp K. Characterization of PA-N terminal domain of Influenza A polymerase reveals sequence specific RNA cleavage. 2013. *Nucleic Acids Res* 41:8289-8299
12. Hagen M, Tiley L, Chung TD, Krystal M. The role of template-primer interactions in cleavage and initiation by the influenza virus polymerase. 1995. *J Gen Virol* 76 ( Pt 3):603-611
13. Reich S, Guilligay D, Cusack S. An in vitro fluorescence based study of initiation of RNA synthesis by influenza B polymerase. 2017. *Nucleic acids research* 45:3353-3368
14. Geerts-Dimitriadou C, Goldbach R, Kormelink R. Preferential use of RNA leader sequences during influenza A transcription initiation in vivo. 2011. *Virology* 409:27-32

15. Koppstein D, Ashour J, Bartel DP. Sequencing the cap-snatching repertoire of H1N1 influenza provides insight into the mechanism of viral transcription initiation. 2015. *Nucleic Acids Res* 43:5052-5064
16. Krug RM, Broni BA, LaFiandra AJ, Morgan MA, Shatkin AJ. Priming and inhibitory activities of RNAs for the influenza viral transcriptase do not require base pairing with the virion template RNA. 1980. *Proceedings of the National Academy of Sciences* 77:5874-5878
17. Sikora D, Rocheleau L, Brown EG, Pelchat M. Deep sequencing reveals the eight facets of the influenza A/HongKong/1/1968 (H3N2) virus cap-snatching process. 2014. *Sci Rep* 4:6181
18. Geerts-Dimitriadou C, Zwart MP, Goldbach R, Kormelink R. Base-pairing promotes leader selection to prime in vitro influenza genome transcription. 2011. *Virology* 409:17-26
19. Fodor E, Crow M, Mingay LJ, Deng T, Sharps J, Fechter P, Brownlee GG. A single amino acid mutation in the PA subunit of the influenza virus RNA polymerase inhibits endonucleolytic cleavage of capped RNAs. 2002. *J Virol* 76:8989-9001
20. Deng T, Sharps J, Fodor E, Brownlee GG. In vitro assembly of PB2 with a PB1-PA dimer supports a new model of assembly of influenza A virus polymerase subunits into a functional trimeric complex. 2005. *J Virol* 79:8669-8674
21. Kerry PS, Willsher N, Fodor E. A cluster of conserved basic amino acids near the C-terminus of the PB1 subunit of the influenza virus RNA polymerase is involved in the regulation of viral transcription. 2008. *Virology* 373:202-210
22. Lee MT, Bishop K, Medcalf L, Elton D, Digard P, Tiley L. Definition of the minimal viral components required for the initiation of unprimed RNA synthesis by influenza virus RNA polymerase. 2002. *Nucleic Acids Res* 30:429-438
23. te Velthuis AJ. Common and unique features of viral RNA-dependent polymerases. 2014. *Cell Mol Life Sci* 71:4403-4420
24. Lee M-K, Bae S-H, Park C-J, Cheong H-K, Cheong C, Choi B-S. A single-nucleotide natural variation (U4 to C4) in an influenza A virus promoter exhibits a large structural change: implications for differential viral RNA synthesis by RNA-dependent RNA polymerase. 2003. *Nucleic acids research* 31:1216-1223
25. Vreede FT, Jung TE, Brownlee GG. Model suggesting that replication of influenza virus is regulated by stabilization of replicative intermediates. 2004. *J Virol* 78:9568-9572

26. Hara K, Schmidt FI, Crow M, Brownlee GG. Amino acid residues in the N-terminal region of the PA subunit of influenza A virus RNA polymerase play a critical role in protein stability, endonuclease activity, cap binding, and virion RNA promoter binding. 2006. *J Virol* 80:7789-7798
27. Larkin MA, Blackshields G, Brown NP, Chenna R, McGettigan PA, McWilliam H, Valentin F, Wallace IM, Wilm A, Lopez R, Thompson JD, Gibson TJ, Higgins DG. Clustal W and Clustal X version 2.0. 2007. *Bioinformatics* 23:2947-2948
28. Robert X, Gouet P. Deciphering key features in protein structures with the new ENDscript server. 2014. *Nucleic Acids Res* 42:W320-W324
29. Deng T, Vreede FT, Brownlee GG. Different de novo initiation strategies are used by influenza virus RNA polymerase on its cRNA and viral RNA promoters during viral RNA replication. 2006. *J Virol* 80:2337-2348



**Figure 1. Transcription initiation by the influenza virus RdRp produces three RNA species.** (A) Schematic of cap cleavage and transcription initiation with a capped 11 nucleotide long primer. The duplex of the viral promoter is shaded black, the 3' end orange and the 5' end grey. The capped primer is shaded red and the priming loop drawn as a dotted line. Alignment of the capped primer to 1U or 2C is also depicted. (B) SDS-PAGE analysis followed by Coomassie staining of purified IAV RdRp. (C) Extension of a radiolabelled capped 11-nucleotide long primer in the presence of four NTPs. The products produced from position 2C (CP) and 3G (GP) as well as the realignment product (RP) are indicated. The promoter schematic shows the primary initiation site on the wild-type IAV promoter with colours as in Fig. 1A. The graph shows the accumulation of the GP, CP and RP signals as fraction of the total transcriptional activity. Lines represent fits to an exponential decay of one representative experiment. (D) Alignment of IAV transcription products present in the GP or CP bands as identified by TOPO cloning and Sanger sequencing. (E) Alignment of IAV transcription products present in the RP band.





**Figure 2. Realignment during IAV transcription involves 4U and 1U of the template strand.** (A) Extension of a radiolabelled capped 11-nucleotide long RNA in the presence of unlabelled NTPs and IAV RdRp. The schematic shows the primary initiation site on the wild-type or mutant 2C→A 3' promoter strand. (B) Extension of a radiolabelled capped 11-nucleotide long RNA primer ending in 3' CA on the wild-type vRNA promoter or the 3' 1U→A mutant promoter. (C) Extension of a radiolabelled capped 11-nucleotide long RNA primer ending in 3' AA on the wild-type vRNA promoter or the 3' 1U→A mutant promoter. (D) Extension of a radiolabelled capped 11-nucleotide long RNA primer ending in 3' AG on the wild-type, 3' 1U→A, or 3' 4U→A vRNA promoter. (E) Model of realignment after initiation from 3G. Colours as in Fig. 1A. (F) Extension of a radiolabelled capped 11-nucleotide long RNA primer ending in 3' AG on the wild-type vRNA promoter or a 3' 4U→C mutant promoter.



**Figure 3. Transcription elongation is affected by the primer sequence. (A)** Extension of a radiolabelled capped 11-nucleotide long RNA with 3' AU sequence in the presence of four NTPs. Graph shows mean RP: GP+CP ratio of 3 independent assay. Error bars indicate standard deviation. The p-values were determined using an unpaired t-test. **(B)** Extension of a radiolabelled capped 11-nucleotide long primer with 3' UG sequence on the wild-type vRNA promoter or the 3' 1U→A mutant promoter.



**Figure 4. The priming loop affects transcription elongation.** (A) Superposed structures of the influenza B virus RdRp (PDB 5MSG) with the poliovirus 3D<sup>pol</sup> RdRp elongation complex (PDB 3OL7). Of the poliovirus 3D<sup>pol</sup> complex, part of the nascent strand (red) and two nucleotides of the template (dark blue) are shown. These superposed structures illustrate the putative path of the partially resolved capped primer (red) from the 5MSG structure and the position of the priming loop (PL) relative to the putative path of the rest of the capped primer. (B) Amino acid alignment of the PB1 priming loop sequences of the IAV A/WSN/33 (H1N1), influenza B virus B/Michigan/22687/09, and influenza C virus C/JJ/50. Identical residues are shaded red, conserved residues boxed in blue and the secondary structure interpretations based on PDB 4WSB. Also shown is a schematic of the PB1 priming loop truncation mutants (7) used in this study. (C) Extension of a radiolabelled capped 11-nucleotide primer ending in 3' AG in the presence of wild-type or mutant IAV RdRp purified from 293T cells. Bottom panel shows SDS-PAGE analysis followed by silverstaining of purified IAV RdRps. (D) Mean accumulation of transcription products initiated from 3G and 2C (GP+CP) or produced after realignment (RP). Error bars show standard deviations ( $n = 3$ ). (E) Fold change in realignment relative to wild-type after normalisation to the total transcription activity. Error bars show standard deviations ( $n = 3$ ). The p-values were determined using an unpaired t-test.





**Figure 5. Model for influenza A virus transcription initiation and elongation.** IAV transcription can initiate with a capped primer that fully base pairs with the 3' 1U and 2C of the vRNA (GP formation), a primer that base pairs only with the 3' 1U (CP formation) or a primer that only Watson-Crick base pairs with 2C and not 3' 1U (GP\* formation; non-Watson-Crick base pairing is indicated as a mismatch). Based on PDB 5MSG, 6 bases of the 3' vRNA terminus are located in the template entry channel during GP synthesis, while three bases (3' 7U, 8C and 9G) remain single-stranded between the duplex at the surface of the RdRp and the template entry channel. Of these three residues, 7U and 8C are stacked in a T-orientation by residues of the PB2 subunit (the 'T-pocket'). It is likely that the interaction between PB2 and 7U is sequence specific as a 7U→A mutation was previously shown to abrogate *de novo* initiation (29). The priming loop stabilises the capped primer in the active site ( $\Delta G_{PL-primer}$ ) to suppress realignment. When the 3' 1U of the vRNA leaves position -4 of the active site, realignment may occur depending on the stability of the template-primer duplex. On a vRNA promoter containing a 3' 4U, realignment will proceed (grey dotted line) via the CP pathway. On a vRNA promoter containing a 3' 4C (segment 1, 2, and 3 of the IAV genome), realignment will proceed via the GP\* pathway. It is known that this mutation down regulates transcription (24).

**Table 1:** RNA primers.

| Primer  | Length | Sequence (5' to 3') |
|---------|--------|---------------------|
| AG      | 11     | ppGAAUACUCAAG       |
| CA      | 11     | pppGAAUACUCACA      |
| UG      | 11     | pppGAAUACUCAUG      |
| AU      | 11     | pppGAAUACUCAAU      |
| AA      | 11     | pppGAAUACUCAA       |
| vRNA 5' | 15     | AGUAGAAACAAGGCC     |
| vRNA 3' | 14     | GGCCUGCUUUUGCU      |
